# Supplementary material for: Fusimonas intestini gen. nov., sp. nov., a novel intestinal bacterium of the family Lachnospiraceae associated with diabetes in mice
Source: PubMed Central journal article supplement (PMC5741734; doi:10.1038/s41598-017-18122-2), 2017-12-22
Supplement: 41598_2017_18122_MOESM1_ESM.pdf [file 41598_2017_18122_MOESM1_ESM.pdf]

Supplementary information:

***Fusimonas intestini* gen. nov., sp. nov., a novel intestinal bacterium of the family *Lachnospiraceae* associated with diabetes in mice**

Hiroyuki Kusada<sup>1§</sup>, Keishi Kameyama<sup>2§</sup>, Xian-Ying Meng<sup>1</sup>, Yoichi Kamagata<sup>1</sup> & Hideyuki Tamaki<sup>1\*</sup>

<sup>1</sup> *Bioproduction Research Institute, National Institute of Advanced Industrial Science and Technology (AIST), Central 6, 1-1-1 Higashi, Tsukuba, Ibaraki 305-8566, Japan*

<sup>2</sup> *Frontier Research Laboratories, Institute for Innovation, Ajinomoto Co., Inc., 1-1 Suzuki-cho, Kawasaki, Kanagawa 210-8681, Japan*

§These authors contributed equally to this work.

\*Correspondence: Hideyuki Tamaki, Bioproduction Research Institute, National Institute of Advanced Industrial Science and Technology (AIST), Central 6-10, Higashi 1-1-1, Tsukuba, Ibaraki 305-8566, Japan

Tel: +81-29-861-6591. Fax: +81-29-861-6587. E-mail: tamaki-hideyuki@aist.go.jp

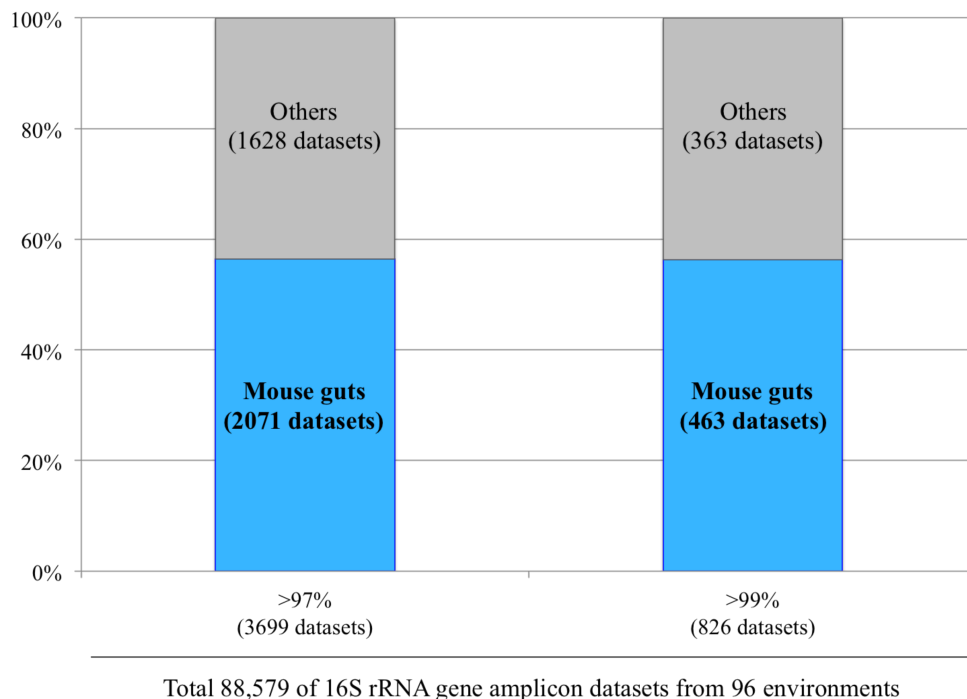

**Supplementary Figure S1. Potential habitability of *F. intestini* strain AJ110941<sup>P</sup> based on IMNGS search using the 16S rRNA gene sequence (AB861470).** Prevalence of *F. intestini*-related sequences (>97% and >99% sequence similarity) against all 16S rRNA sequence datasets. The relative abundances of *F. intestini*-related 16S rRNA gene sequences in mouse guts and non-mouse guts are shown in blue and gray, respectively.
